# Supplementary material
Source: PubMed Central journal article supplement (PMC1892849)
Supplement: aem_73_9_3061__1.pdf [file aem_73_9_3061__1.pdf]

**Supplementary Figure 1:** (A) Products after 35 PCR cycles using vector-specific primers that flank the library insertion site. 1  $\mu$ L of PCR reaction was loaded directly onto a 1.0% agarose gel. Template for lanes 2-5 was 5 ng of *E. coli* pLib1, lanes 7-10 was 5 ng of pIMP1 vector DNA, and lanes 12-15 was 100 ng of *C. acetobutylicum* genomic DNA. Final  $Mg^{+2}$  concentrations were 2 mM (lanes 2,7, and 12), 4 mM (lanes 3,8, and 13), 6 mM (lanes 4,9, and 14), and 8 mM (lanes 5,10, and 15). Lanes 1 and 16 contain the  $\lambda$ BsteII standard, and lanes 6 and 11 contain the  $\phi$ X174-HaeIII standard. (B) Impact of increasing PCR cycles on product mass using 5 ng of *E. coli* pLib1 template. PCR samples were Qiagen purified, eluted in 80  $\mu$ L 10 mM Tris-HCl, and  $A_{260}$  readings taken. (C) Characterization of potential bias due to PCR amplification of library inserts. Amplified library inserts after 17, 19, 21, and 23 PCR cycles were Qiagen purified, labeled with Cy3, and hybridized to DNA microarrays against sonicated, Cy5-labeled, *E. coli* pLib1 DNA.

**Supplementary Figure 2:** Cell density ( $A_{600}$ ) and metabolite profiles of *C. acetobutylicum* (pLib1) cultures challenged with 0% (—◆—), 0.62% (—■—), 1.24% (—▲—), or 1.56% (—×—) 1-butanol. (A) Cell Density. (B) Glucose. (C) Acetate. (D) Butyrate. (E) Net butanol production, calculated by subtracting the initial butanol challenge concentration from each subsequently measured butanol concentration.

**Supplementary Figure 3:** Signal intensity ranks over the course of butanol challenge transfers for the 10 genes with the highest signal intensity rank as of the 13<sup>th</sup> transfer for (A) biological replicate experiment 1 and (B) biological replicate experiment 2. Bar color-coding is as follows:

■ - Inoculum; ■ - Transfer 4; ■ - Transfer 7; ■ - Transfer 10; ■ - Transfer 13

**Supplementary Figure 4:** Static flask cultures of 824(pCAC1869) (—■—) and 824(pIMP1) (---○---) in the absence of external butanol stress. (A)  $A_{600}$ . (B) Residual glucose. (C) Butanol production.

**Supplementary Table 1:** Unique library inserts identified by sequencing plasmids from individual colonies plated from the 1.56% butanol challenge bottle. Shown are the chromosomal (or megaplasmid) start and end positions of each sequenced insert, the insert length, the identity of the gene in which each insert starts/ends, and whether the start/end positions are inside of an ORF (open reading frame) or an IR (intergenic region).

**Supplementary Table 2:** Key parameters of stationary-phase transfer challenge experiments (Protocol II). See text for details of experimental design. Butanol challenge concentration, glucose consumption, and metabolite production at each challenge level determined by HPLC are shown. For comparison, the parameters resulting from single-transfer experiments at discrete challenge levels (Protocol I) are also shown. 10 mL test tubes of CGM containing 100 g/L glucose and 100  $\mu$ g/mL Em were inoculated from each challenge transfer to determine the capacity of stress-selected cultures to produce butanol. These tube cultures were incubated and sampled after 168 hours and again after 216 hours to determine final metabolite levels.

**Supplementary Table 3:** Plasmid DNA isolated from the challenge inoculum was PCR amplified and hybridized against oppositely labeled, amplified plasmid DNA from the 4<sup>th</sup>, 7<sup>th</sup>, 10<sup>th</sup>, and 13<sup>th</sup> challenge transfers. Intensities for each gene with signal-noise ratio > 3 were then ranked for each microarray, and a table of genes generated showing the rank of every gene at a given transfer, as well as the average signal intensity of three DNA microarray target-spots per gene.

# Supplementary Figure 1

(A)

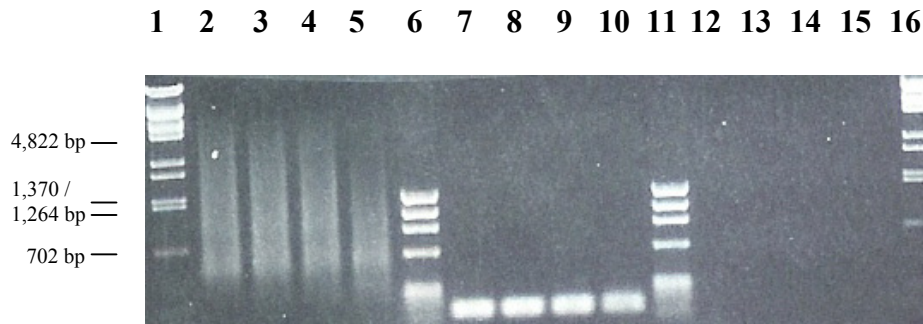

(B)

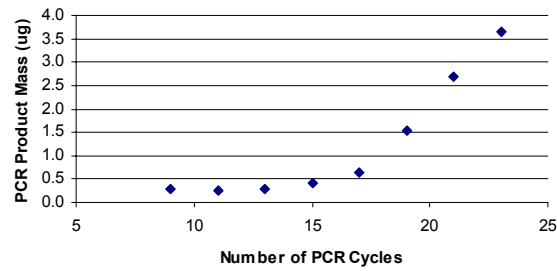

(C)

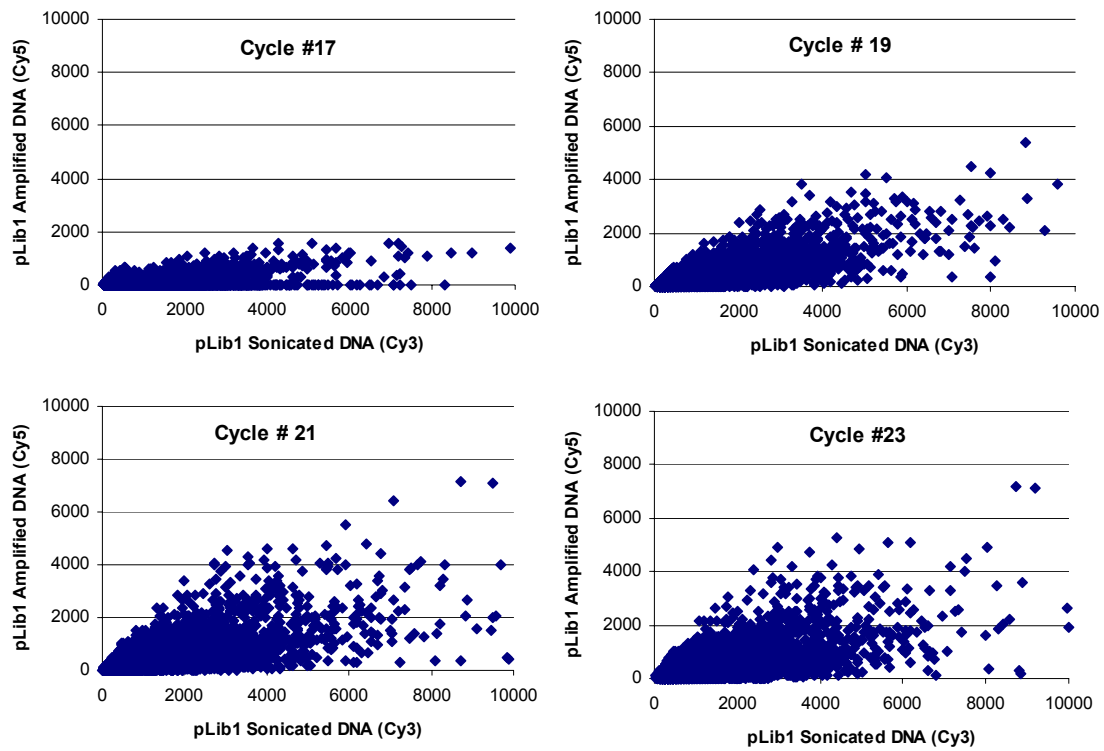

Supplementary Figure 2

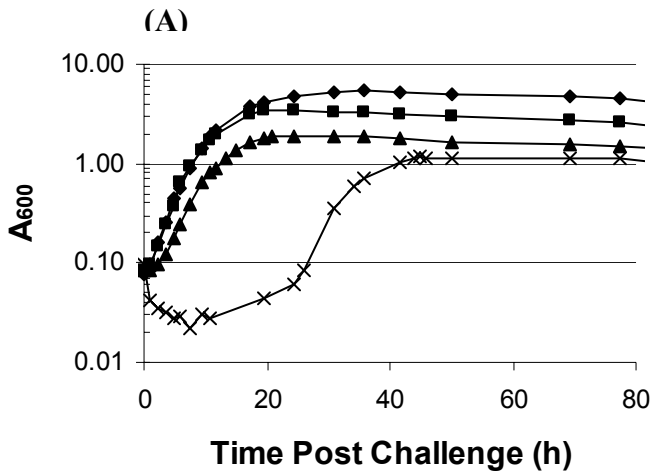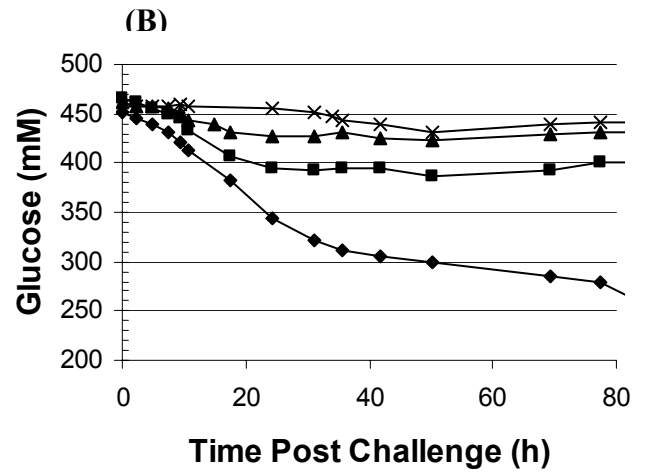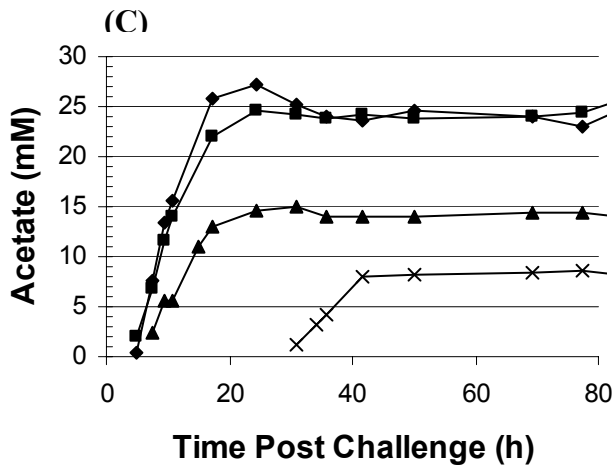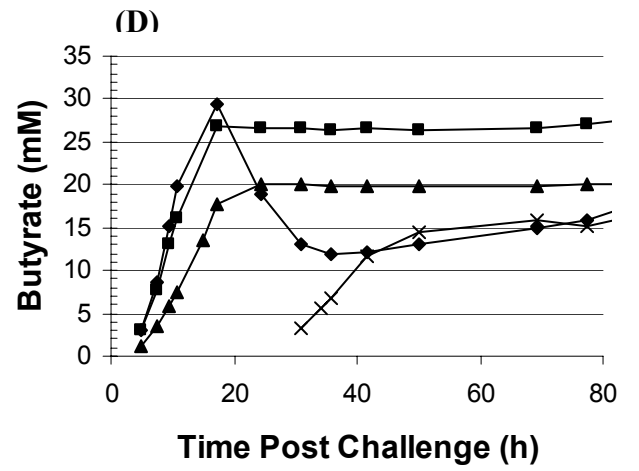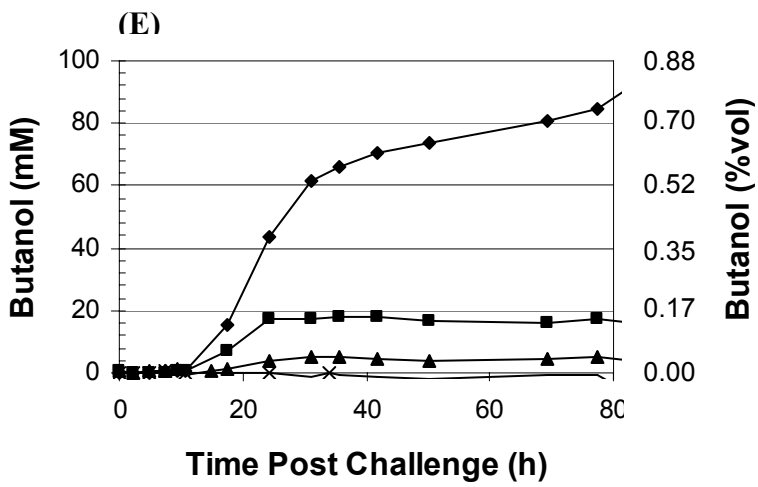

### Supplementary Figure 3

(A)

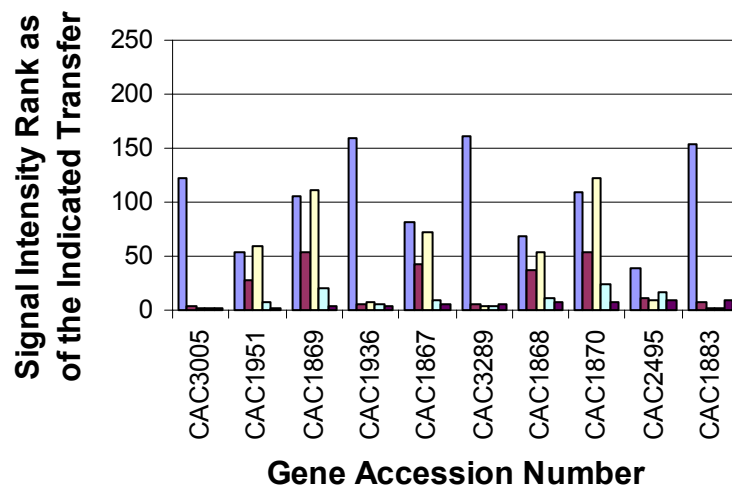

(B)

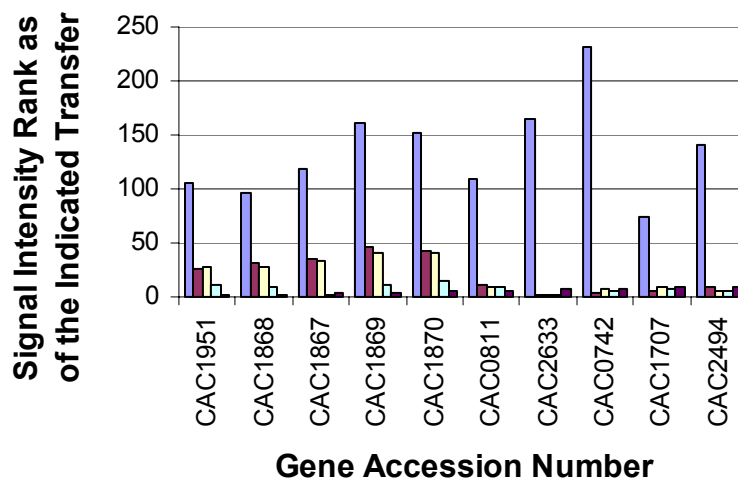

Supplementary Figure 4

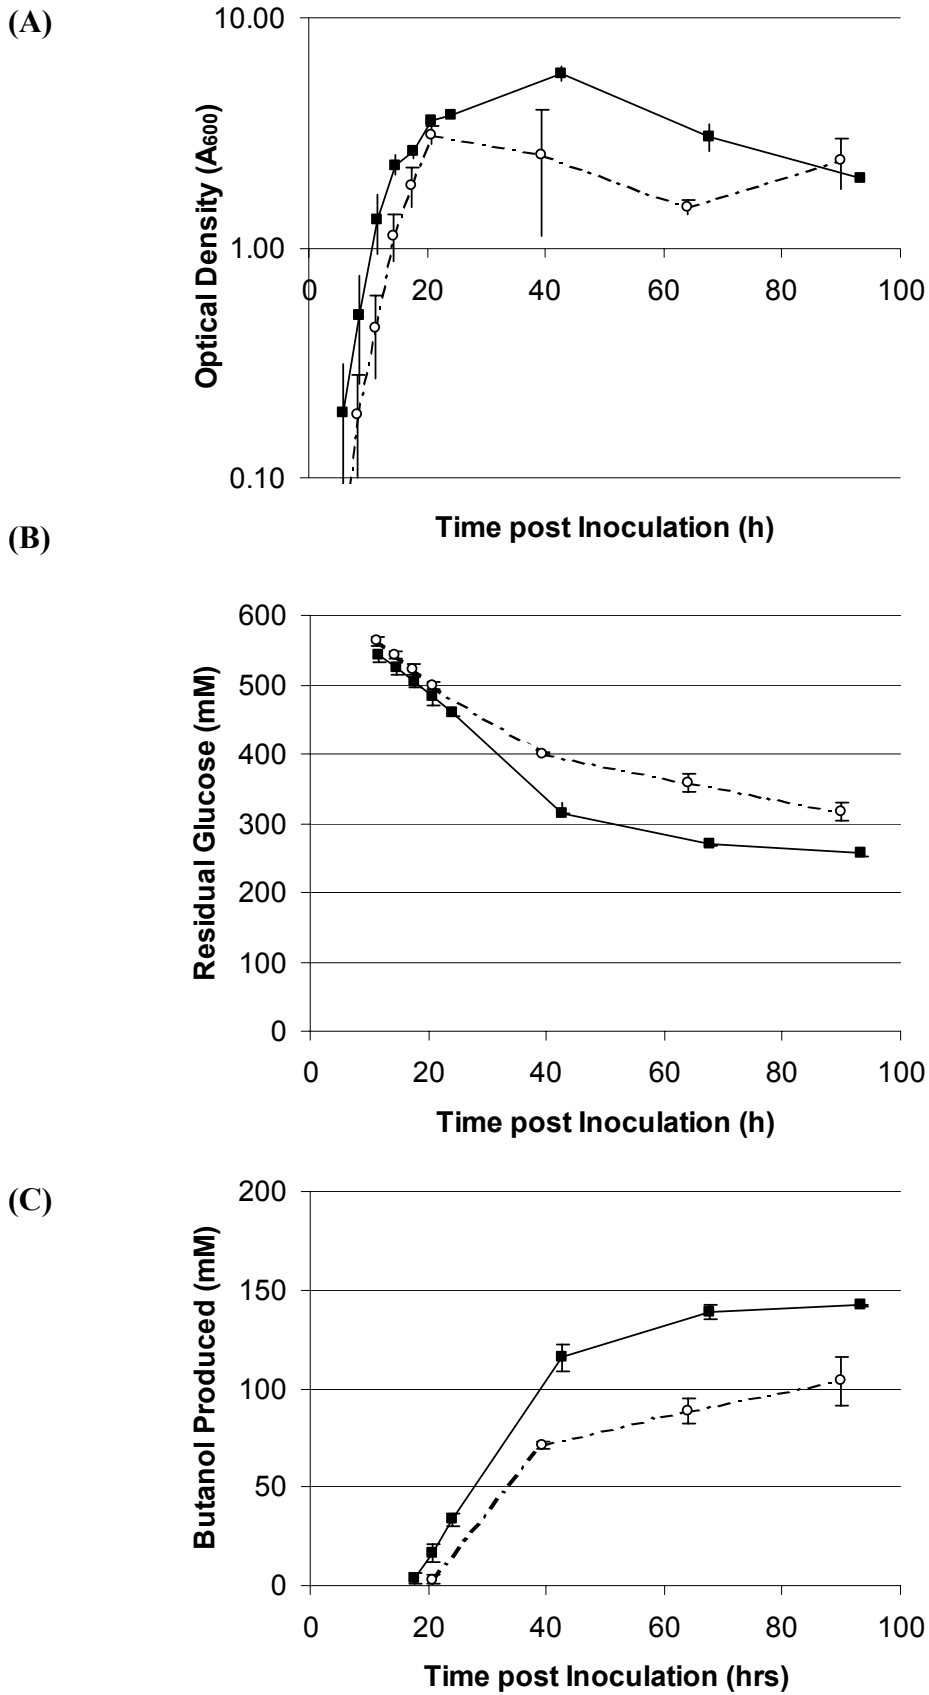

**Supplementary Table 1**

| Insert | Start     | End       | Length | Insert Start | Start Loc | Insert End | End Loc | # of Clones | Entire ORF? |
|--------|-----------|-----------|--------|--------------|-----------|------------|---------|-------------|-------------|
| 1      | 2,991     | 3,639     | 648    | CAC0002      | ORF       | CAC0004    | ORF     | 6           | Y           |
| 2      | 200,039   | 200,793   | 754    | CAC0176      | ORF       | CAC0176    | ORF     | 1           | N           |
| 3      | 295,498   | 295,659   | 161    | CAC0263      | ORF       | CAC0263    | ORF     | 1           | N           |
| 4      | 805,577   | 806,788   | 1211   | CAC0696      | ORF       | CAC0697    | ORF     | 4           | N           |
| 5      | 1,148,483 | 1,149,352 | 869    | CAC1002      | ORF       | CAC1002    | ORF     | 1           | N           |
| 6      | 1,267,666 | 1,268,659 | 993    | CAC1098      | ORF       | CAC1098    | ORF     | 1           | N           |
| 7      | 2,485,906 | 2,486,445 | 539    | CAC2376      | ORF       | CAC2377    | ORF     | 2           | N           |
| 8      | 2,979,258 | 2,979,601 | 343    | CAC2846      | ORF       | CAC2846    | ORF     | 1           | N           |
| 9      | 3,056,382 | 3,057,183 | 801    | CAC2922      | ORF       | CAC2923    | ORF     | 1           | N           |
| 10     | 3,073,532 | 3,073,776 | 244    | CAC2941      | IR        | CAC2942    | ORF     | 1           | N           |
| 11     | 3,187,582 | 3,188,104 | 522    | CAC3038      | ORF       | CAC3038    | IR      | 1           | N           |
| 12     | 3,925,011 | 3,925,086 | 75     | CAC3718      | ORF       | CAC3718    | ORF     | 1           | N           |
| 13     | 49,111    | 49,252    | 141    | CAP0049      | IR        | CAP0049    | IR      | 1           | N           |
| 14     | 83,161    | 83,391    | 230    | CAP0073      | IR        | CAP0073    | IR      | 1           | N           |

**Supplementary Table 2**

| Transfer               | Volume % Butanol |       | mM Glucose Consumed |       | Final Metabolite Levels |      |          |      |          |       | Outgrowth Test Tube Butanol Production |        |
|------------------------|------------------|-------|---------------------|-------|-------------------------|------|----------|------|----------|-------|----------------------------------------|--------|
|                        | Rep1             | Rep2  | Rep1                | Rep2  | Acetate                 |      | Butyrate |      | Butanol* |       | Rep1**                                 | Rep2** |
| 1                      | 0.47%            | 0.47% | 248.2               | 224.8 | 9.9                     | 9.7  | 22.3     | 23.0 | 111.8    | 107.7 | 1.49%                                  | 1.51%  |
| 3                      | 0.57%            | 0.55% | 201.6               | 203.8 | 7.4                     | 7.9  | 17.4     | 18.2 | 63.6     | 68.0  | 1.36%                                  | 1.48%  |
| 4                      | 0.86%            | 0.74% | 176.9               | 179.9 | 8.6                     | 8.6  | 18.1     | 17.8 | 59.2     | 79.8  | 1.31%                                  | 1.51%  |
| 9                      | 1.19%            | 1.25% | 98.8                | 84.6  | 5.4                     | 7.4  | 14.0     | 18.1 | 28.9     | 27.9  | 1.41%                                  | 1.57%  |
| 10 <sup>1</sup>        | 1.30%            | 1.30% | 31.0                | 62.5  | 9.2                     | 11.5 | 0.0      | 21.8 | 0.0      | 19.0  | 1.70%                                  | 1.17%  |
| 11                     | 1.39%            | 1.43% | 45.8                | 44.1  | 10.0                    | 9.9  | 23.5     | 26.3 | 0.0      | 1.1   | 1.51%                                  | 0.42%  |
| 12                     | 1.52%            | 1.51% | 39.7                | 47.6  | 6.4                     | 9.2  | 20.6     | 25.3 | 0.0      | 0.0   | 1.07%                                  | 0.32%  |
| 13                     | 1.56%            | 1.56% | 36.7                | 22.6  | 8.4                     | 8.2  | 22.0     | 20.8 | 0.0      | 1.0   | 1.55%                                  | 1.47%  |
| 14                     | 1.62%            | 1.60% | 23.2                | 24.1  | 3.1                     | 6.8  | 18.6     | 19.4 | 0.0      | 0.0   | 1.86%                                  | 1.89%  |
| Protocol I Challenges: |                  |       |                     |       |                         |      |          |      |          |       |                                        |        |
| 0.00%                  | -                | -     | 190.0               | -     | 24.7                    | -    | 17.3     | -    | 92.3     | -     |                                        |        |
| 0.62%                  | 0.62%            | -     | 63.6                | -     | 25.6                    | -    | 27.4     | -    | 16.3     | -     |                                        |        |
| 1.24%                  | 1.24%            | -     | 30.0                | -     | 14.0                    | -    | 20.1     | -    | 3.7      | -     |                                        |        |
| 1.56%                  | 1.56%            | -     | 16.8                | -     | 8.2                     | -    | 16.0     | -    | 0.0      | -     |                                        |        |

Rep1 and Rep2 refer to biological replicate challenge experiments 1 & 2

\* Butanol value shown is the final measured level minus the initial challenge level

\*\* Butanol production is the average of two-10 mL test tubes of CGM containing 100 g/L glucose and 100 µg/mL erythromycin and inoculated with 100 µL of the the indicated challenge bottle and grown 168-216 h

1 824(plIMP1) plasmid control cultures did not grow in 10<sup>th</sup> transfer, containing 1.30% butanol



Supplementary  
Table 3

(A)

| Gene    | Transfer<br>13<br>Rank | Transfer<br>10<br>Rank | Transfer<br>7<br>Rank | Transfer<br>4<br>Rank | Unchallenged<br>Inoculum<br>Rank | Transfer<br>13<br>Intensity | Transfer<br>10<br>Intensity | Transfer<br>7<br>Intensity | Transfer<br>4<br>Intensity | Unchallenged<br>Inoculum<br>Intensity |
|---------|------------------------|------------------------|-----------------------|-----------------------|----------------------------------|-----------------------------|-----------------------------|----------------------------|----------------------------|---------------------------------------|
| CAC3005 | 1                      | 1                      | 1                     | 3                     | 123                              | 65059                       | 65054                       | 65075                      | 64994                      | 1210                                  |
| CAC1951 | 2                      | 8                      | 60                    | 27                    | 54                               | 65058                       | 51916                       | 1463                       | 11279                      | 5298                                  |
| CAC1869 | 3                      | 20                     | 111                   | 53                    | 105                              | 65054                       | 20534                       | 547                        | 3415                       | 1578                                  |
| CAC1936 | 4                      | 6                      | 7                     | 6                     | 160                              | 65051                       | 62504                       | 58549                      | 64971                      | 639                                   |
| CAC1867 | 5                      | 10                     | 73                    | 43                    | 81                               | 65046                       | 42143                       | 1044                       | 5538                       | 2711                                  |
| CAC3289 | 6                      | 3                      | 3                     | 5                     | 161                              | 65045                       | 65025                       | 65052                      | 64974                      | 638                                   |
| CAC1868 | 7                      | 11                     | 53                    | 37                    | 68                               | 64944                       | 38488                       | 1707                       | 7385                       | 3663                                  |
| CAC1870 | 8                      | 25                     | 123                   | 54                    | 109                              | 64630                       | 17778                       | 461                        | 3104                       | 1532                                  |
| CAC2495 | 9                      | 16                     | 9                     | 11                    | 38                               | 62872                       | 23821                       | 53650                      | 47415                      | 8223                                  |
| CAC1883 | 10                     | 2                      | 2                     | 7                     | 153                              | 61387                       | 65039                       | 65066                      | 64967                      | 725                                   |
| CAC2494 | 11                     | 23                     | 13                    | 19                    | 63                               | 46764                       | 18947                       | 29854                      | 20649                      | 4336                                  |
| CAC0395 | 12                     | 5                      | 4                     | 2                     | 173                              | 45310                       | 64514                       | 64202                      | 65007                      | 512                                   |
| CAC3446 | 13                     | 4                      | 5                     | 9                     | 214                              | 42498                       | 64984                       | 64113                      | 61588                      | 341                                   |
| CAC1874 | 14                     | 7                      | 6                     | 8                     | 151                              | 36018                       | 62112                       | 60991                      | 62918                      | 741                                   |
| CAC1883 | 15                     | 9                      | 11                    | 10                    | 167                              | 35693                       | 44684                       | 30635                      | 56128                      | 578                                   |
| CAC2413 | 16                     | 12                     | 8                     | 4                     | 130                              | 31406                       | 36267                       | 55975                      | 64979                      | 970                                   |
| CAC3359 | 17                     | 18                     | 14                    | 1                     | 268                              | 26942                       | 21288                       | 26277                      | 65009                      | 234                                   |
| CAC1291 | 18                     | 19                     | 18                    | 12                    | 166                              | 23177                       | 20854                       | 16776                      | 42389                      | 587                                   |
| CAC3445 | 19                     | 14                     | 12                    | 13                    | 308                              | 20246                       | 33500                       | 30566                      | 40939                      | 185                                   |
| CAC1124 | 20                     | 34                     | 25                    | 18                    | 158                              | 17106                       | 8568                        | 8413                       | 22792                      | 653                                   |
| CAC0706 | 21                     | 24                     | 17                    | 17                    | 44                               | 15652                       | 18658                       | 17580                      | 23619                      | 7356                                  |
| CAC1137 | 22                     | 21                     | 19                    | 21                    | 9                                | 13405                       | 20469                       | 16731                      | 20272                      | 22821                                 |
| CAC2840 | 23                     | 22                     | 15                    | 16                    | 336                              | 12777                       | 20180                       | 18257                      | 25342                      | 158                                   |
| CAC1767 | 24                     | 26                     | 20                    | 39                    | 697                              | 12318                       | 17648                       | 11332                      | 6839                       | 34                                    |
| CAC0494 | 25                     | 27                     | 22                    | 22                    | 100                              | 11705                       | 15802                       | 10106                      | 17229                      | 1694                                  |
| CAP0139 | 26                     | 42                     | 54                    | 28                    | 61                               | 9972                        | 5457                        | 1703                       | 10328                      | 4507                                  |
| CAC1225 | 27                     | 17                     | 16                    | 24                    | 199                              | 9223                        | 21734                       | 18064                      | 15346                      | 385                                   |
| CAC3288 | 28                     | 15                     | 28                    | 32                    | 692                              | 8628                        | 27984                       | 6306                       | 7727                       | 34                                    |
| CAC1675 | 29                     | 13                     | 10                    | 14                    | 98                               | 8504                        | 34335                       | 36207                      | 36724                      | 1798                                  |
| CAC1137 | 30                     | 31                     | 33                    | 65                    | 30                               | 7253                        | 12009                       | 4048                       | 2482                       | 10195                                 |
| CAC1935 | 31                     | 57                     | 44                    | 76                    | 721                              | 6947                        | 3183                        | 2090                       | 1670                       | 25                                    |
| CAC3184 | 32                     | 29                     | 24                    | 34                    | 62                               | 6797                        | 13324                       | 9451                       | 7555                       | 4387                                  |
| CAC0811 | 33                     | 32                     | 31                    | 58                    | 28                               | 6596                        | 11891                       | 4819                       | 2918                       | 10579                                 |
| CAC1711 | 34                     | 33                     | 26                    | 48                    | 41                               | 6477                        | 11093                       | 8265                       | 4588                       | 7918                                  |
| CAC0865 | 35                     | 128                    | 64                    | 26                    | 176                              | 5686                        | 717                         | 1362                       | 13700                      | 502                                   |
| CAC0831 | 36                     | 40                     | 48                    | 60                    | 56                               | 4939                        | 6306                        | 1846                       | 2819                       | 5233                                  |
| CAC1976 | 37                     | 35                     | 62                    | 107                   | 76                               | 4277                        | 7907                        | 1385                       | 931                        | 3099                                  |
| CAC2851 | 38                     | 38                     | 29                    | 42                    | 50                               | 4169                        | 6841                        | 5156                       | 6259                       | 6163                                  |
| CAC0260 | 39                     | 46                     | 32                    | 49                    | 59                               | 3963                        | 4457                        | 4614                       | 3942                       | 4659                                  |
| CAC1326 | 40                     | 44                     | 35                    | 40                    | 45                               | 3938                        | 5077                        | 3696                       | 6783                       | 7255                                  |
| CAC3309 | 41                     | 259                    | #N/A                  | 229                   | 718                              | 3827                        | 210                         | #N/A                       | 256                        | 26                                    |
| CAC3358 | 42                     | 39                     | 30                    | 23                    | 460                              | 3703                        | 6828                        | 5025                       | 16187                      | 82                                    |
| CAC3360 | 43                     | 28                     | 38                    | 33                    | 11                               | 3681                        | 14565                       | 3239                       | 7724                       | 21157                                 |
| CAC2920 | 44                     | 52                     | 37                    | 66                    | 93                               | 2963                        | 3630                        | 3335                       | 2455                       | 1929                                  |
| CAC1231 | 45                     | 49                     | 51                    | 87                    | 113                              | 2824                        | 4023                        | 1741                       | 1335                       | 1403                                  |
| CAC2342 | 46                     | 43                     | 55                    | 137                   | 67                               | 2752                        | 5371                        | 1676                       | 632                        | 3688                                  |
| CAC0892 | 47                     | 47                     | 101                   | 128                   | 91                               | 2660                        | 4425                        | 684                        | 661                        | 2038                                  |
| CAC2882 | 48                     | 55                     | 112                   | 418                   | 242                              | 2525                        | 3404                        | 533                        | 114                        | 273                                   |
| CAC1692 | 49                     | 30                     | 21                    | 25                    | 297                              | 2472                        | 13169                       | 10376                      | 14918                      | 197                                   |
| CAC3112 | 50                     | 41                     | 70                    | 74                    | 29                               | 2366                        | 5668                        | 1124                       | 1880                       | 10535                                 |
| CAC1024 | 51                     | 45                     | 49                    | 94                    | 77                               | 2312                        | 4640                        | 1841                       | 1153                       | 2954                                  |
| CAC0075 | 52                     | 61                     | 43                    | 77                    | 39                               | 2301                        | 2834                        | 2108                       | 1668                       | 8148                                  |
| CAC3525 | 53                     | 50                     | 34                    | 36                    | 529                              | 2270                        | 3976                        | 3963                       | 7419                       | 64                                    |
| CAC1931 | 54                     | 58                     | 50                    | 112                   | 60                               | 2229                        | 3127                        | 1779                       | 842                        | 4534                                  |
| CAC0740 | 55                     | 48                     | 36                    | 30                    | 55                               | 2216                        | 4251                        | 3466                       | 8052                       | 5291                                  |
| CAC3006 | 56                     | 51                     | 39                    | 56                    | 82                               | 2054                        | 3860                        | 2884                       | 2965                       | 2568                                  |
| CAC1045 | 57                     | 63                     | 46                    | 79                    | 86                               | 1948                        | 2633                        | 1992                       | 1637                       | 2262                                  |
| CAC2056 | 58                     | 198                    | #N/A                  | #N/A                  | #N/A                             | 1740                        | 326                         | #N/A                       | #N/A                       | #N/A                                  |
| CAC3526 | 59                     | 67                     | 40                    | 45                    | 600                              | 1706                        | 2345                        | 2687                       | 5369                       | 51                                    |
| CAC1726 | 60                     | 72                     | 58                    | 61                    | 74                               | 1693                        | 1842                        | 1483                       | 2640                       | 3241                                  |
| CAC2343 | 61                     | 78                     | 89                    | 118                   | 95                               | 1653                        | 1642                        | 791                        | 798                        | 1912                                  |
| CAC1417 | 62                     | 66                     | 67                    | 113                   | 78                               | 1631                        | 2358                        | 1188                       | 838                        | 2843                                  |
| CAC2917 | 63                     | 37                     | 56                    | 47                    | 3                                | 1614                        | 6940                        | 1626                       | 4667                       | 38192                                 |
| CAC3079 | 64                     | 59                     | 47                    | 59                    | 69                               | 1571                        | 2918                        | 1953                       | 2895                       | 3483                                  |
| CAC0412 | 65                     | 64                     | 52                    | 72                    | 12                               | 1551                        | 2468                        | 1732                       | 1985                       | 20044                                 |
| CAC0449 | 66                     | 68                     | 61                    | 71                    | 15                               | 1514                        | 2320                        | 1431                       | 1999                       | 17860                                 |
| CAC0771 | 67                     | 76                     | 80                    | 105                   | 24                               | 1513                        | 1699                        | 931                        | 965                        | 11229                                 |
| CAC3379 | 68                     | 56                     | 42                    | 64                    | 73                               | 1479                        | 3356                        | 2258                       | 2549                       | 3263                                  |
| CAC2359 | 69                     | 71                     | 69                    | 83                    | 717                              | 1375                        | 1914                        | 1146                       | 1506                       | 27                                    |
| CAC3087 | 70                     | 65                     | 45                    | 63                    | 684                              | 1356                        | 2424                        | 2079                       | 2554                       | 35                                    |

Supplementary  
Table 3

(B)

| Name    | Transfer   | Transfer   | Transfer  | Transfer  | Unchallenged     | Transfer        | Transfer        | Transfer       | Transfer       | Unchallenged          |
|---------|------------|------------|-----------|-----------|------------------|-----------------|-----------------|----------------|----------------|-----------------------|
|         | 13<br>Rank | 10<br>Rank | 7<br>Rank | 4<br>Rank | Inoculum<br>Rank | 13<br>Intensity | 10<br>Intensity | 7<br>Intensity | 4<br>Intensity | Inoculum<br>Intensity |
| CAC1951 | 1          | 11         | 28        | 26        | 104              | 65022           | 31643           | 2634           | 2010           | 506                   |
| CAC1868 | 2          | 11         | 53        | 37        | 68               | 65011           | 38488           | 1707           | 7385           | 3663                  |
| CAC1867 | 3          | 10         | 73        | 43        | 81               | 65007           | 42143           | 1044           | 5538           | 2711                  |
| CAC1869 | 4          | 20         | 111       | 53        | 105              | 57217           | 20534           | 547            | 3415           | 1578                  |
| CAC1870 | 5          | 25         | 123       | 54        | 109              | 44286           | 17778           | 461            | 3104           | 1532                  |
| CAC0811 | 6          | 32         | 31        | 58        | 28               | 14780           | 11891           | 4819           | 2918           | 10579                 |
| CAC2633 | 7          | 94         | 100       | 81        | 1                | 13840           | 1173            | 686            | 1582           | 54835                 |
| CAC0742 | 8          | 172        | 164       | 165       | 34               | 9927            | 434             | 316            | 445            | 8887                  |
| CAC1707 | 9          | 153        | 155       | 85        | 17               | 6345            | 528             | 337            | 1359           | 14618                 |
| CAC2494 | 10         | 23         | 13        | 19        | 63               | 5795            | 18947           | 29854          | 20649          | 4336                  |
| CAC3134 | 11         | 79         | 86        | 101       | 18               | 5286            | 1355            | 862            | 1021           | 13075                 |
| CAC0767 | 12         | 89         | 92        | 131       | 7                | 4058            | 1205            | 762            | 644            | 25008                 |
| CAC0706 | 13         | 24         | 17        | 17        | 44               | 3396            | 18658           | 17580          | 23619          | 7356                  |
| CAC0854 | 14         | 132        | 119       | 136       | 22               | 3178            | 689             | 478            | 634            | 11790                 |
| CAC1463 | 15         | 274        | 209       | 285       | 237              | 2389            | 190             | 202            | 178            | 292                   |
| CAC2495 | 16         | 16         | 9         | 11        | 38               | 2373            | 23821           | 53650          | 47415          | 8223                  |
| CAC0977 | 17         | 116        | 96        | 98        | 40               | 2283            | 854             | 718            | 1057           | 8016                  |
| CAC3435 | 18         | 82         | 65        | 92        | 43               | 2008            | 1325            | 1345           | 1197           | 7433                  |
| CAC2409 | 19         | 186        | 238       | 288       | 49               | 1632            | 368             | 174            | 177            | 6764                  |
| CAC2294 | 20         | #N/A       | #N/A      | #N/A      | #N/A             | 1261            | #N/A            | #N/A           | #N/A           | #N/A                  |
| CAC1146 | 21         | 415        | 332       | 369       | 195              | 1194            | 102             | 113            | 130            | 407                   |
| CAC3310 | 22         | 97         | 90        | 99        | 33               | 1160            | 1133            | 773            | 1035           | 8963                  |
| CAC3485 | 23         | 126        | 202       | 57        | 178              | 902             | 743             | 213            | 2926           | 490                   |
| CAC3360 | 24         | 28         | 38        | 33        | 11               | 883             | 14565           | 3239           | 7724           | 21157                 |
| CAC2727 | 25         | #N/A       | #N/A      | #N/A      | #N/A             | 833             | #N/A            | #N/A           | #N/A           | #N/A                  |
| CAC1711 | 26         | 33         | 26        | 48        | 41               | 820             | 11093           | 8265           | 4588           | 7918                  |
| CAC0432 | 27         | 60         | 131       | 90        | 124              | 798             | 2890            | 432            | 1220           | 1152                  |
| CAC0831 | 28         | 40         | 48        | 60        | 56               | 710             | 6306            | 1846           | 2819           | 5233                  |
| CAC2754 | 29         | 289        | 325       | 279       | 119              | 692             | 172             | 116            | 183            | 1267                  |
| CAC2056 | 30         | 198        | #N/A      | #N/A      | #N/A             | 648             | 326             | #N/A           | #N/A           | #N/A                  |
| CAC3485 | 31         | 202        | 166       | 52        | 162              | 608             | 308             | 315            | 3533           | 622                   |
| CAC3006 | 32         | 51         | 39        | 56        | 82               | 603             | 3860            | 2884           | 2965           | 2568                  |
| CAC2917 | 33         | 37         | 56        | 47        | 3                | 600             | 6940            | 1626           | 4667           | 38192                 |
| CAC1225 | 34         | 17         | 16        | 24        | 199              | 595             | 21734           | 18064          | 15346          | 385                   |
| CAC0757 | 35         | 282        | 320       | 473       | 133              | 537             | 177             | 118            | 103            | 958                   |
| CAP0050 | 36         | 86         | 82        | 108       | 25               | 521             | 1251            | 910            | 926            | 11174                 |
| CAC1147 | 37         | 705        | 418       | 559       | 384              | 519             | 65              | 90             | 95             | 123                   |
| CAC0200 | 38         | 80         | 97        | 142       | 20               | 512             | 1336            | 715            | 571            | 12280                 |
| CAC0583 | 39         | 786        | 467       | 355       | 520              | 510             | 55              | 84             | 136            | 66                    |
| CAC1093 | 40         | 115        | 129       | 80        | 90               | 468             | 903             | 440            | 1592           | 2091                  |
| CAC0901 | 41         | 180        | 552       | 395       | 206              | 421             | 407             | 75             | 120            | 370                   |
| CAC2667 | 42         | 315        | 193       | 122       | 37               | 421             | 151             | 230            | 744            | 8463                  |
| CAC3317 | 43         | 328        | #N/A      | #N/A      | #N/A             | 419             | 140             | #N/A           | #N/A           | #N/A                  |
| CAC1936 | 44         | 6          | 7         | 6         | 160              | 396             | 62504           | 58549          | 64971          | 639                   |
| CAC0153 | 45         | 117        | 161       | 214       | 186              | 395             | 846             | 324            | 276            | 460                   |
| CAC0407 | 46         | 285        | 298       | 371       | 101              | 376             | 176             | 125            | 129            | 1691                  |
| CAC0892 | 47         | 47         | 101       | 128       | 91               | 302             | 4425            | 684            | 661            | 2038                  |
| CAC3005 | 48         | 1          | 1         | 3         | 123              | 293             | 65054           | 65075          | 64994          | 1210                  |
| CAC2343 | 49         | 78         | 89        | 118       | 95               | 272             | 1642            | 791            | 798            | 1912                  |
| CAC1132 | 50         | 112        | 110       | 95        | 127              | 263             | 930             | 554            | 1114           | 1046                  |
| CAC1045 | 51         | 63         | 46        | 79        | 86               | 259             | 2633            | 1992           | 1637           | 2262                  |
| CAC1976 | 52         | 35         | 62        | 107       | 76               | 245             | 7907            | 1385           | 931            | 3099                  |
| CAC2410 | 53         | 360        | 343       | 270       | 79               | 241             | 125             | 109            | 192            | 2841                  |
| CAC3002 | 54         | 468        | 393       | 611       | 359              | 235             | 87              | 94             | 89             | 137                   |
| CAC1863 | 55         | 338        | 329       | 344       | 142              | 221             | 137             | 114            | 142            | 832                   |
| CAC0303 | 56         | 113        | 88        | 73        | 70               | 218             | 930             | 821            | 1981           | 3455                  |
| CAC0564 | 57         | 268        | 218       | 333       | 253              | 214             | 200             | 195            | 148            | 256                   |
| CAC3446 | 58         | 4          | 5         | 9         | 214              | 214             | 64984           | 64113          | 61588          | 341                   |
| CAC1126 | 59         | 318        | 273       | 67        | 258              | 211             | 150             | 139            | 2348           | 245                   |
| CAC1940 | 60         | 292        | 331       | 268       | 256              | 207             | 169             | 113            | 197            | 250                   |
| CAC0031 | 61         | 514        | 435       | 678       | 522              | 206             | 80              | 88             | 83             | 65                    |
| CAC1675 | 62         | 13         | 10        | 14        | 98               | 195             | 34335           | 36207          | 36724          | 1798                  |
| CAC1254 | 63         | 299        | 528       | 484       | 180              | 194             | 164             | 77             | 102            | 477                   |
| CAC0342 | 64         | #N/A       | #N/A      | #N/A      | #N/A             | 190             | #N/A            | #N/A           | #N/A           | #N/A                  |
| CAC1988 | 65         | 618        | 613       | 125       | 502              | 188             | 71              | 63             | 680            | 71                    |
| CAC1722 | 66         | 388        | 529       | 578       | 519              | 188             | 109             | 77             | 93             | 66                    |
| CAC2177 | 67         | 62         | 99        | 68        | 47               | 185             | 2776            | 709            | 2341           | 7167                  |
| CAC3669 | 68         | 675        | 383       | 192       | 376              | 184             | 68              | 96             | 322            | 126                   |
| CAC0473 | 69         | 525        | 468       | 513       | 134              | 171             | 79              | 84             | 99             | 947                   |
| CAC0094 | 70         | #N/A       | #N/A      | #N/A      | #N/A             | 171             | #N/A            | #N/A           | #N/A           | #N/A                  |
